# Supplementary material for: Leaching- and fragmentation-free heterogenization of late transition metal complexes as a model system to prove the growth mechanism of polyethylene
Source: Royal Society of Chemistry journal article supplement (doi:10.1039/c0jm01290d), 2010-01-01
Supplement: c0jm01290d.pdf [file c0jm01290d.pdf]

Supplementary Material (ESI) for Journal of Materials Chemistry

This journal is (c) The Royal Society of Chemistry 2010

## Supporting Information

### **Leaching- and fragmentation-free heterogenization of late transition metal complexes as a model system to prove the mechanism of polyethylene growth**

**Bijal Kottukkal Bahuleyan,<sup>‡</sup> <sup>a</sup> Bong Chul Son,<sup>a</sup> Yun Son Ha,<sup>b</sup> So Hyun Lee,<sup>a</sup> Hongsuk Suh,<sup>c</sup> Il Kim<sup>a\*</sup>**

<sup>a</sup> The WCU Center for Synthetic Polymer Bioconjugate Hybrid Materials, Department of Polymer Science and Engineering, Pusan National University, Busan 609 735, Korea,

<sup>b</sup> *Korea Petrochemicals Ltd., Ulsan, Korea.*

<sup>c</sup> *Department of Chemistry, Pusan National University, Busan 609 735, Korea*

<sup>‡</sup> *Current Address: Department of Chemical Engineering, King Fahd University of Petroleum and Minerals, Dahrhan, Kingdom of Saudi Arabia.*

\*Email: ilkim@pusan.ac.kr

## Experimental Section

### Synthesis of Ligands and Catalysts

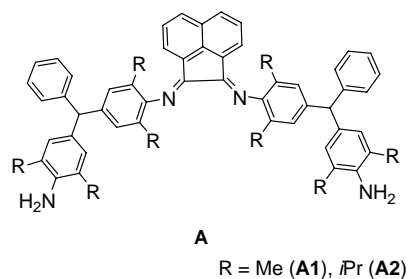

Recently, we reported the synthesis procedure for compound **A1** (R = Me) and **A2** (R = *i*Pr).<sup>S1</sup>

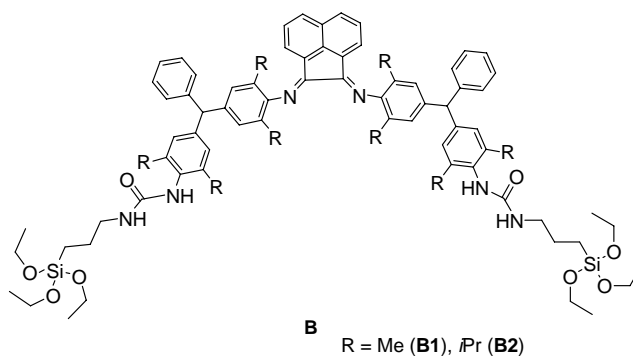

General procedure: Compound **B** was synthesized using the reported procedure.<sup>S2</sup> 3-(triethoxysilyl) propylisocyanate, **L**, was added dropwise to a 20 mL THF solution of compound **A** and stirred overnight at 60 °C. After the reaction, the THF was removed under vacuum and the resulting product was purified by column chromatography [*n*-hexane/ethyl acetate (5:1.5)]. The solvent was evaporated to obtain the product and then dried at 50 °C under vacuum.

### Synthesis of ligand **B1** (R = Me)

Ligand **B1** was synthesized using the method reported elsewhere.<sup>S3</sup>

### Synthesis of ligand **B2** (**R** = *i*Pr)

Orange solid **B2** was obtained in 60% (0.46 g) yield by reacting 1.1 mmol (0.27 mL) of compound **L** with 0.5 mmol (0.52 g) of compound **A1**.  $\delta_{\text{H}}$  (300 MHz;  $\text{CDCl}_3$ ;  $\text{Me}_4\text{Si}$ ) 0.64 (4 H, t), 1.17 (18 H, t), 1.21 (24 H, t), 1.52 (24 H, t), 1.67 (4 H, m), 2.43 (4 H, sept.), 2.79 (4 H, sept.), 3.12 (4 H, t), 3.81 (12 H, m), 5.48 (2 H, s), 5.92 (4 NH, s), 6.21 (6 H, m), 6.45 (4 H, m), 6.90 (4 H, m), 7.22 (4 H, m), 7.97 (2 H, d) 8.08 (4 H, m);  $\delta_{\text{C}}$  (75 MHz;  $\text{CDCl}_3$ )  $\delta$  8.14, 17.97, 23.30, 23.81, 24.50, 27.36, 27.89, 45.35, 56.26, 59.64, 118.55, 123.38, 124.39, 126.39, 127.02, 128.55, 129.98, 130.43, 132.36, 137.11, 137.78, 138.38, 139.11, 140.59, 142.81, 144.33, 145.31, 150.92, 162.43. Found: C, 73.95; H, 8.48; N, 5.50.  $\text{C}_{94}\text{H}_{128}\text{N}_6\text{O}_8\text{Si}_2$  requires C, 73.97; H, 8.45; N, 5.51%.

### Synthesis of complex **C**.<sup>S1</sup>

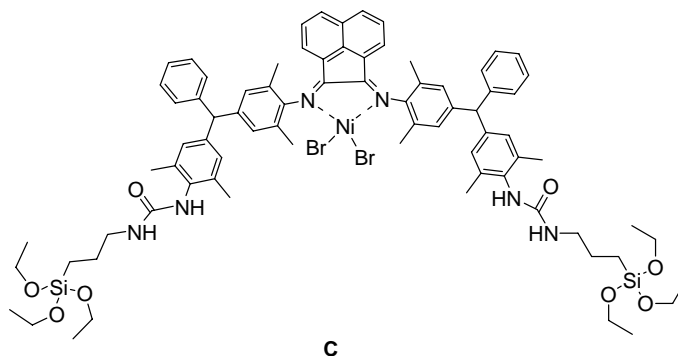

Complex **C** was synthesized using the method reported elsewhere.<sup>S3</sup>

### Synthesis of silica gel support

Silica gel with was synthesized using the well known Stöber method.<sup>S4</sup> For example, 0.5 mL TEOS (tetra ethylorthosilicate) was added to a solution of 8 mL ethanol containing 1 mL  $\text{H}_2\text{O}$  and 1 mL  $\text{NH}_4\text{OH}$ , and stirred for 3 h to form the silica gel solution, which was used directly for

Supplementary Material (ESI) for Journal of Materials Chemistry

This journal is (c) The Royal Society of Chemistry 2010

immobilization. The size of the silica gel was varied by adjusting the amount of H<sub>2</sub>O, NH<sub>4</sub>OH and ethanol.<sup>S4</sup> For the nano size silica gel, the reaction mixture was stirred overnight without adding water.

### Supporting Figures

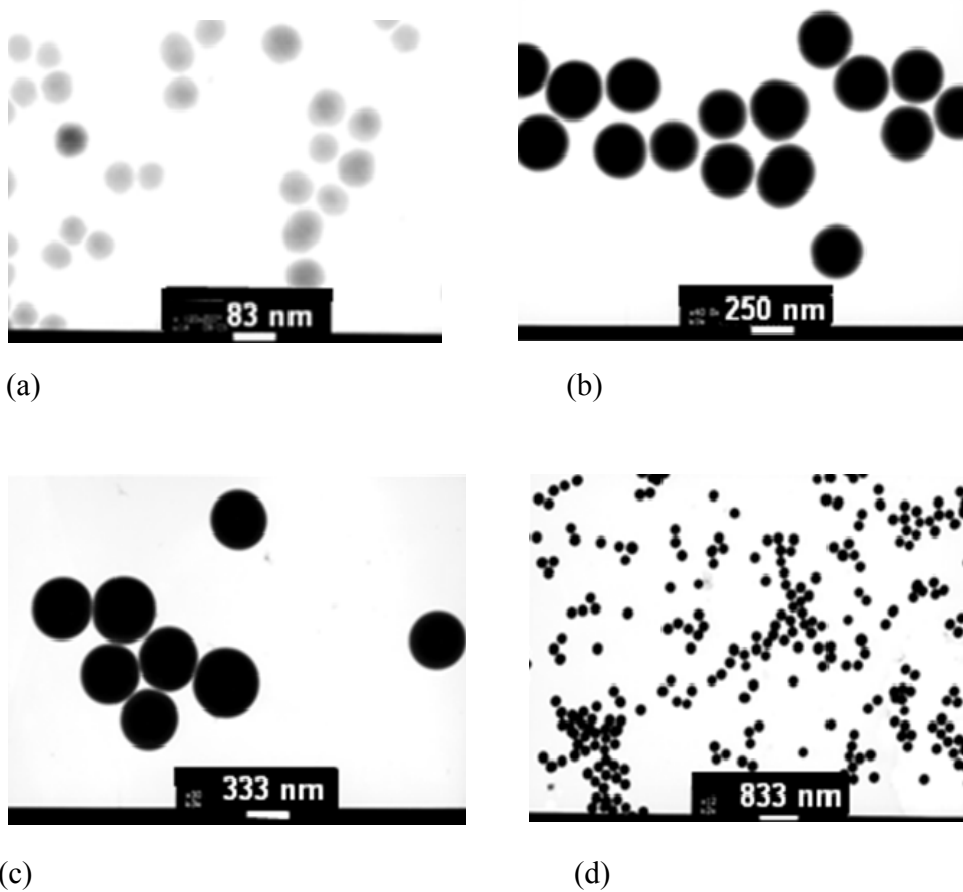

**Figure S1:** TEM images of silica gel having size (a) 70-90 nm; (b) 280-300 nm; (c) and (d) ~600 nm.

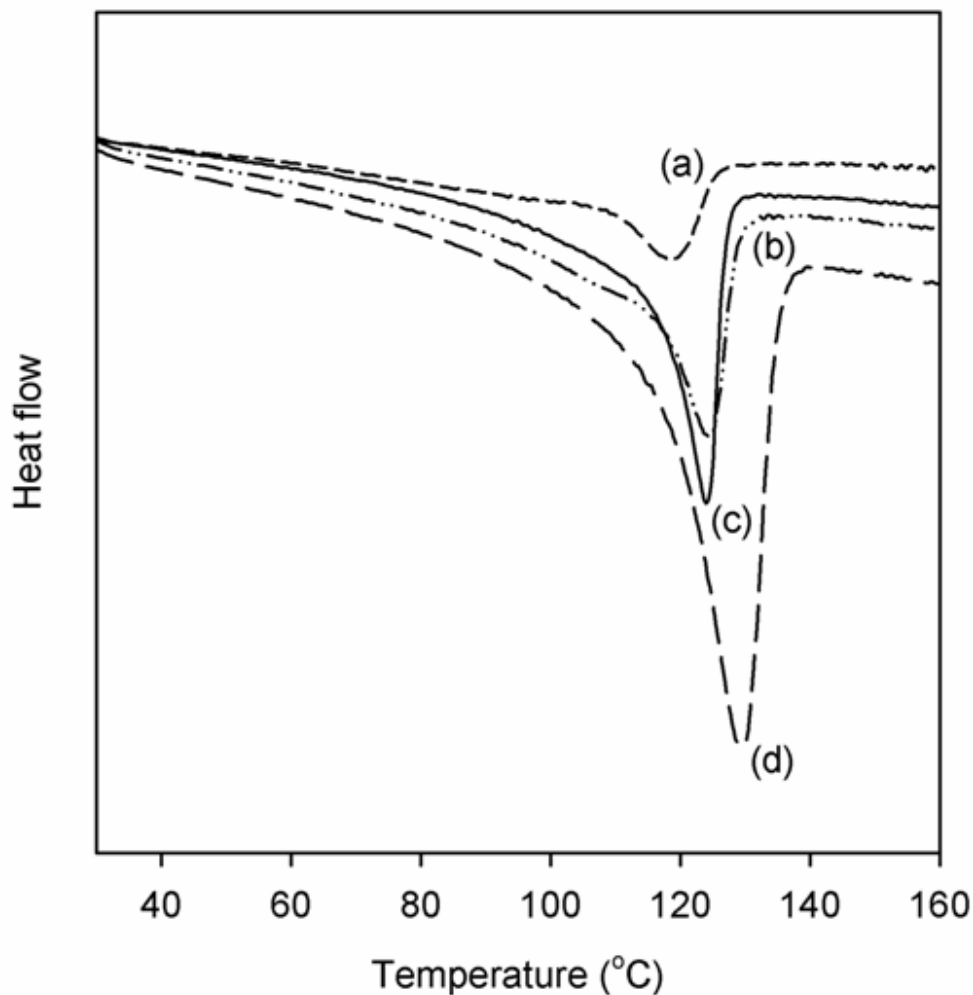

**Figure S2:** DSC curves of PE obtained by (a) homogeneous catalyst **C** at 5.5 bar; (b) catalyst **2** at 1.3 bar; (c) catalyst **2** at 5.5 bar and (d) catalyst **1a** at 5.5 bar. Polymerization condition, i) at 1.3 bar: toluene solvent = 80 mL in a 250 mL glass reactor, temperature = 30 °C, catalyst = 7  $\mu\text{mol}$  for (b); ii) at 5.5 bar: toluene solvent = 40 mL in a 100 mL reactor, temperature = 30 °C, catalyst = 18  $\mu\text{mol}$  for (a), (c) and (d).

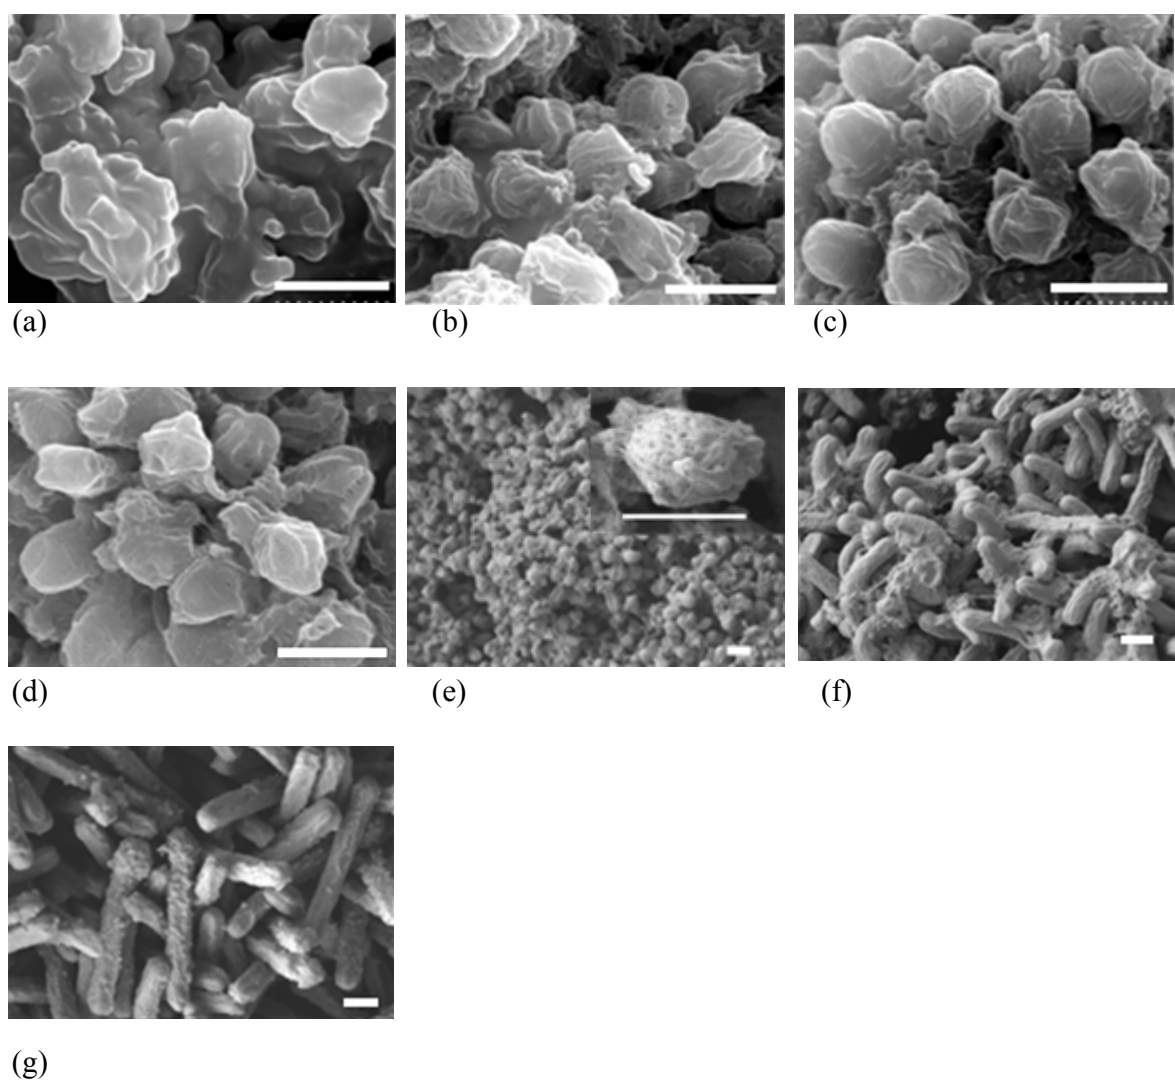

**Figure S3:** SEM images of PE obtained at various stage of polymerization by **1a**/EASC; (a) after 1 min; (b) after 2 min; (c) after 3 min; (d) after 4 min; (e) after 6 min; (f) after 20 min; (g) after 1 h (Scale bar = 2 μm).

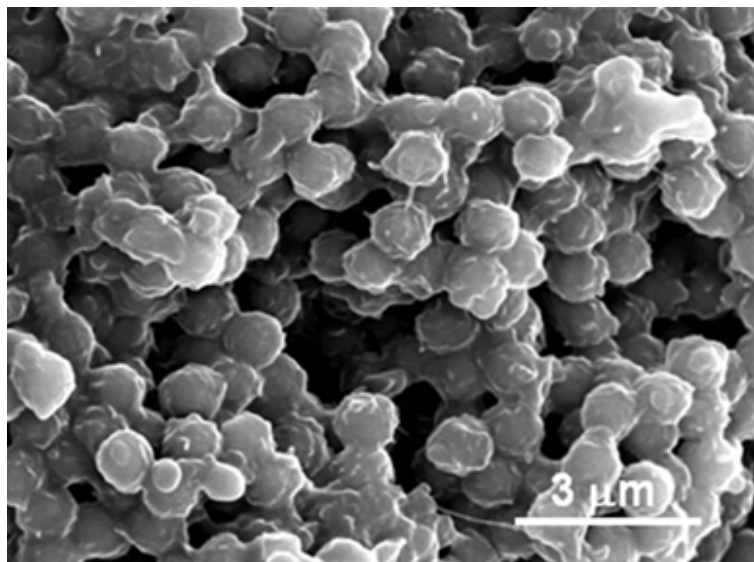

**Figure S4:** SEM image of PE obtained by **1a**/EASC at 70 °C in toluene.

## References

- S1. B. K. Bahuleyan, G. W. Son, D. W. Park, C. S. Ha and I. Kim, *J. Polym. Sci. Part. A: Polym. Chem.* 2008, **46**, 1066.
- S2. (a) S. J. Lee, S. S. Lee, M. S. Lah, J. M. Houng and J. H. Jung, *Chem. Commun.* 2006, 4539. (b) J. W. Park, S. S. Park, I. Kim, and C. S. Ha, *Mol. Cryst. Liq. Cryst.* 2007, **463**, 157.



Supplementary Material (ESI) for Journal of Materials Chemistry

This journal is (c) The Royal Society of Chemistry 2010

S3. B. K. Bahuleyan, B. R. Jermy, I. Y. Ahn, H. Suk, D. W. Park, C. S. Ha and I. Kim, *Cat. Comm.* 2009, **11**, 252.

S4. (a) W. Stöber, A. Fink and E. Bohn, *J. Colloid Interface Sci.* 1968, **26**, 62. (b) K. Lee, J. L. Look, M. T. Harris, and A. V. McCormick, *J. Colloid Interface Sci.* 1997, **194**, 78.
